# Supplementary material
Source: ML conference proceedings conference paper supplement (https://openaccess.thecvf.com/content/WACV2024/html/Raine_Image_Labels_Are_WACV_2024_paper.html)
Supplement: Supplementary file 2 [file Raine_Image_Labels_Are_WACV_2024_supplemental.zip]

Archive with 2 entries (2 files):
- 1056-supp.pdf
- 1056-video.mp4
